# Supplementary material for: A benzothiazole-based fluorescent probe for hypochlorite – highly sensitive detection and live-cell imaging research
Source: Royal Society of Chemistry journal article supplement (doi:10.1039/d5ay01966d), 2025-12-30
Supplement: d5ay01966d1.pdf [file d5ay01966d1.pdf]

A Benzothiazole - Based Fluorescent Probe for Hypochlorite - Highly Sensitive  
Detection and Live - Cell Imaging Research

Kelong Fang<sup>‡</sup>, Xiaozhen Ma<sup>‡</sup>, Yuliang Jiang<sup>\*</sup>

School of Chemistry and Materials Science, Nanjing Normal University, Nanjing  
210023, China

**List of contents**

1. Synthesis of 2-1
2. Synthesis of 2-2
3. <sup>1</sup>H NMR and <sup>13</sup>C NMR of 2-1
4. <sup>1</sup>H NMR and <sup>13</sup>C NMR of 2-2
5. <sup>1</sup>H NMR and <sup>13</sup>C NMR of the probe BZDC
6. NMR Titration Experiment
7. Mass spectrum data of the product after the response between probe BZDC and OCl<sup>-</sup>.
8. Cytotoxicity testing of probe BZDC

## 1 、 Synthesis of 2-1

In a 100 mL three-necked flask, o-aminothiophenol (20 mmol, 2.20 mL), p-hydroxybenzaldehyde (20 mmol, 2.4424 g), sodium metabisulfite ( $\text{Na}_2\text{S}_2\text{O}_5$ , 40 mmol, 7.5636 g) and N, N-dimethylformamide (DMF, 30 mL) were added sequentially. The mixture was stirred at 120 °C for 3 h, and the reaction progress was monitored by thin-layer chromatography (TLC) until completion. After the reaction, the mixture was allowed to stand and cooled to room temperature, then poured into ice water, resulting in a large amount of milky white precipitate. The precipitate was collected by vacuum filtration, washed with ice water for 3 times, and dried under vacuum to obtain Compound 2-1 as a white powder with a yield of 72.50% (3.2921 g).  $^1\text{H}$  NMR (400 MHz,  $\text{DMSO-d}_6$ )  $\delta$  10.21(s,1H), 8.10-8.06(m,1H), 7.99-7.91(m,3H), 7.50(ddd,  $J=8.3, 7.2, 1.3\text{Hz}$ , 1H), 7.40(ddd,  $J=8.3, 7.2, 1.2\text{Hz}$ , 1H), 6.95 6.91(m,2H).  $^{13}\text{C}$  NMR (101 MHz,  $\text{DMSO-d}_6$ ):  $\delta$  167.45, 160.5, 153.73, 134.10, 129.04, 126.42, 124.89, 124.04, 122.30, 122.11, 116.09, 116.08.

## 2 、 Synthesis of 2-2

Hexamethylenetetramine (HMTA, 15 mmol, 2.1030 g) was added to a 100 mL three-necked flask, followed by the slow addition of trifluoroacetic acid (25 mL). The mixture was heated to 80 °C and reacted for 1 h. Then, Compound 2-1 (3 mmol, 0.6811 g) was added into the flask, and the reaction was continued for another 12 h. The reaction progress was monitored by thin-layer chromatography (TLC) until completion. After cooling to room temperature, the reaction solution was poured into ice water, and a yellow precipitate formed immediately. The precipitate was collected by vacuum filtration, washed with water three times, and dried under vacuum. The crude product was purified by column chromatography using petroleum ether/ethyl acetate (15:1, V/V) as the eluent, affording Compound 2-2 as a yellow solid with a yield of 48.33% (0.3698 g).  $^1\text{H}$  NMR (400 MHz,  $\text{DMSO-d}_6$ )  $\delta$  11.44(s,1H), 10.37(s,1H), 8.33(d,  $J=2.4\text{Hz}$ , 1H), 8.23(dd,  $J=8.7, 2.5\text{Hz}$ , 1H), 8.15-8.12(m,1H), 8.04(dt,  $J=8.1, 1.0\text{Hz}$ , 1H), 7.54(ddd,  $J=8.3, 7.2, 1.3\text{Hz}$ , 1H), 7.45(ddd,  $J=8.3, 7.2, 1.2\text{Hz}$ , 1H), 7.20(d,  $J=8.7\text{Hz}$ , 1H).  $^{13}\text{C}$  NMR (101 MHz,  $\text{DMSO-d}_6$ ):  $\delta$  190.39, 166.25, 162.98, 153.55, 134.55, 129.02, 127.50, 126.62, 125.28, 124.42, 122.58, 122.27, 118.46, 116.07.

3、(A)

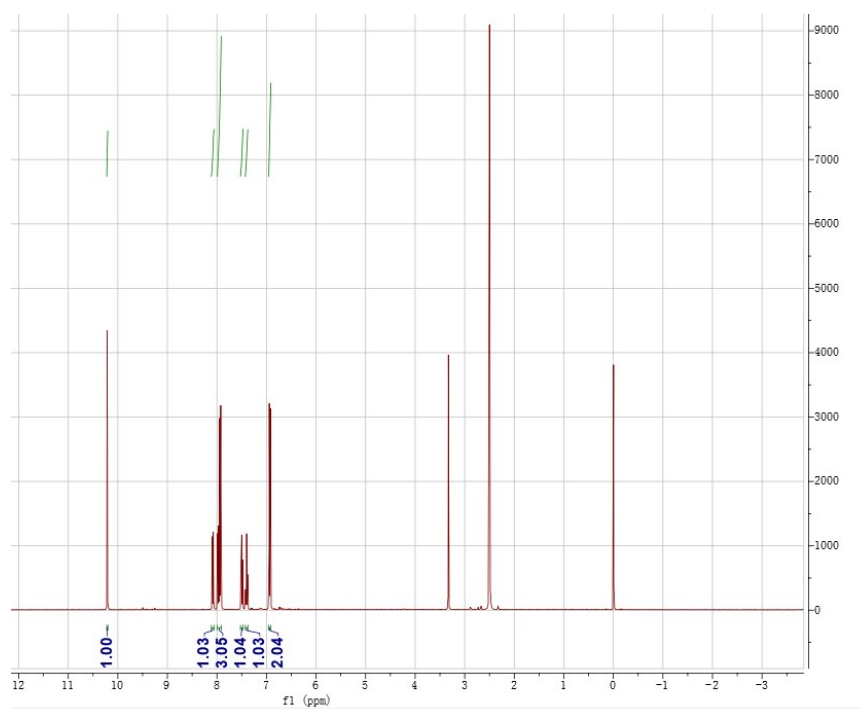

(B)

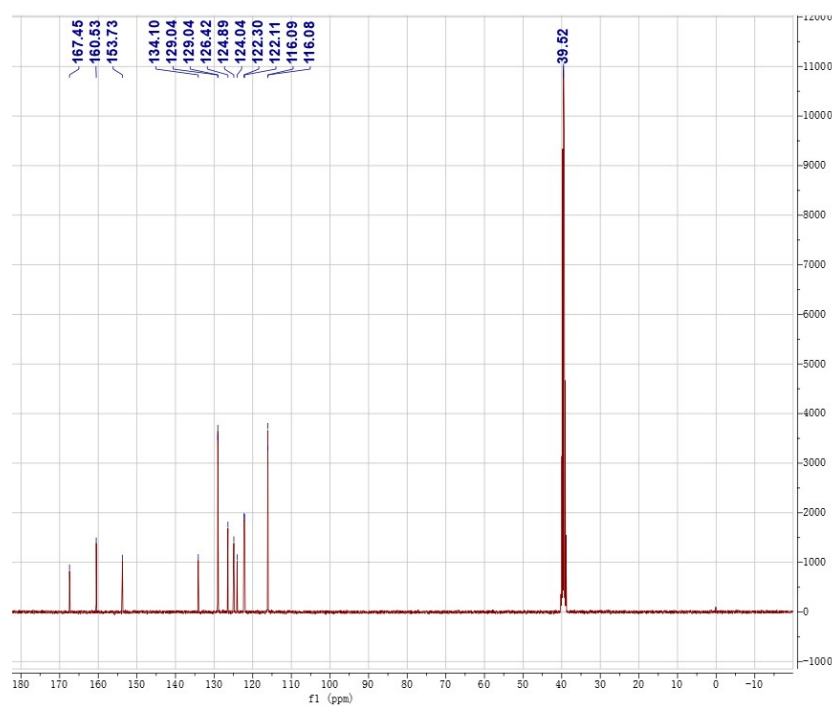

Fig. S1. <sup>1</sup>H NMR (A) and <sup>13</sup>C NMR (B) of 2-1

4、(A)

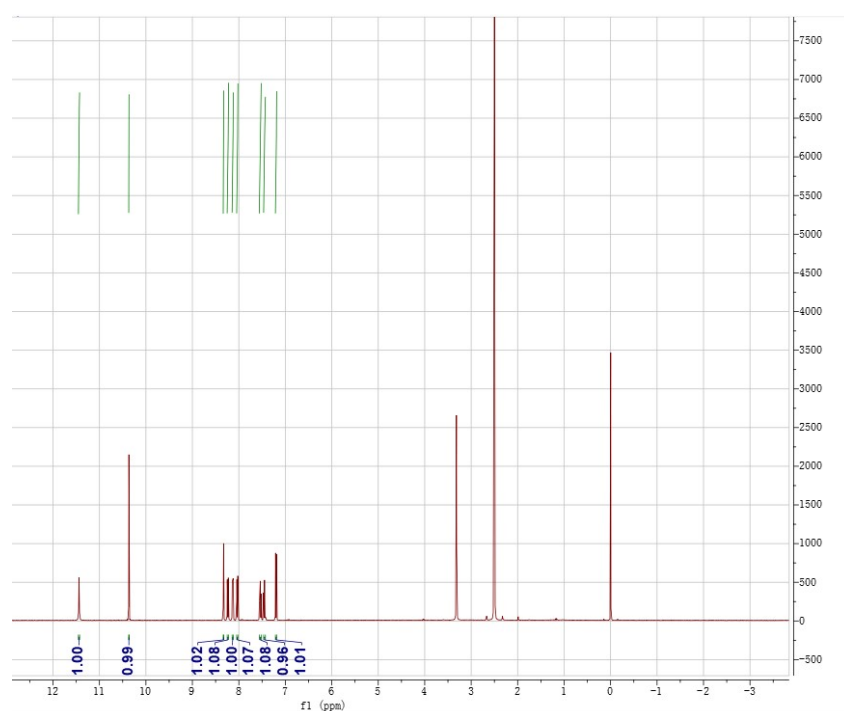

(B)

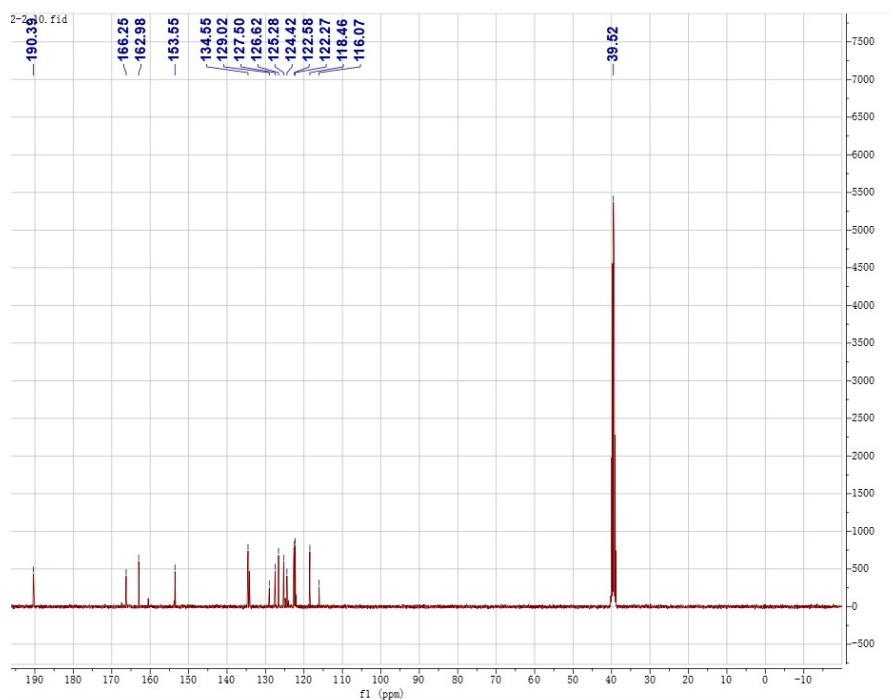

Fig. S2. <sup>1</sup>H NMR (A) and <sup>13</sup>C NMR (B) of 2-2

5、(A)

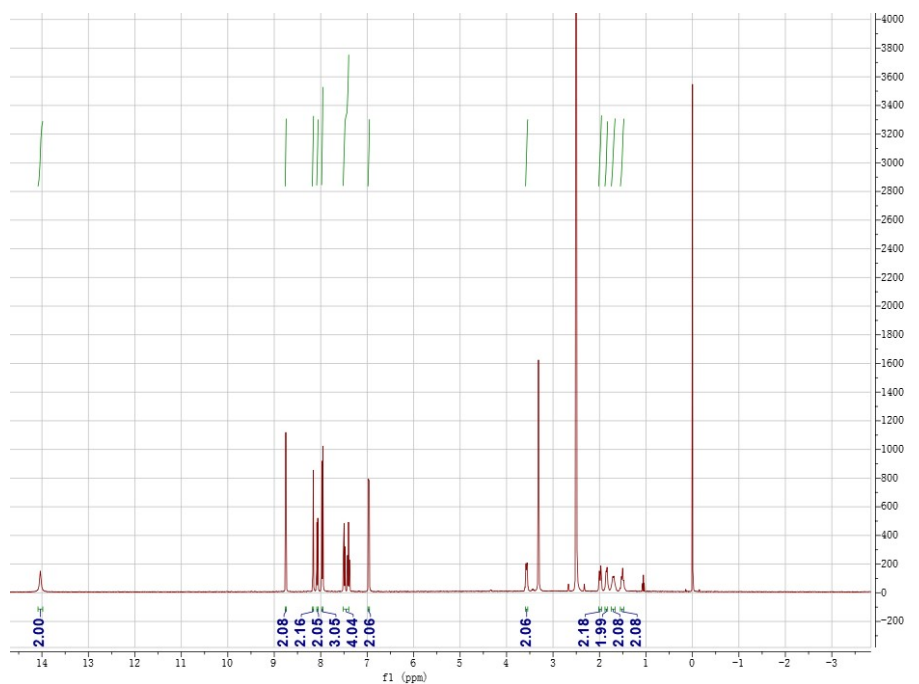

(B)

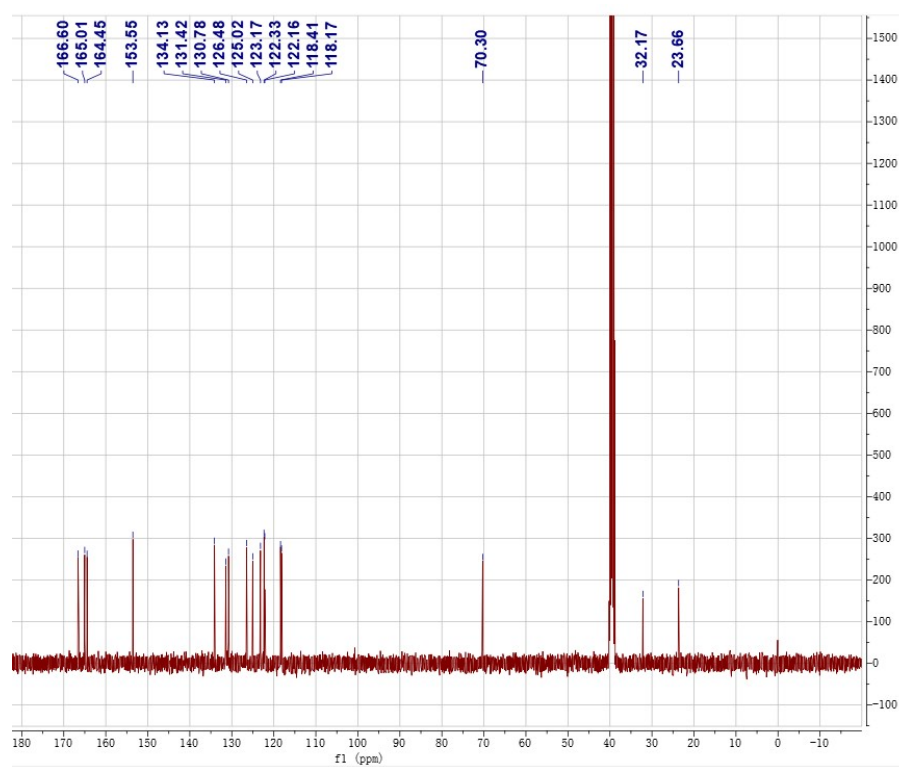

Fig. S3. <sup>1</sup>H NMR (A) and <sup>13</sup>C NMR (B) of the probe BZDC

6、

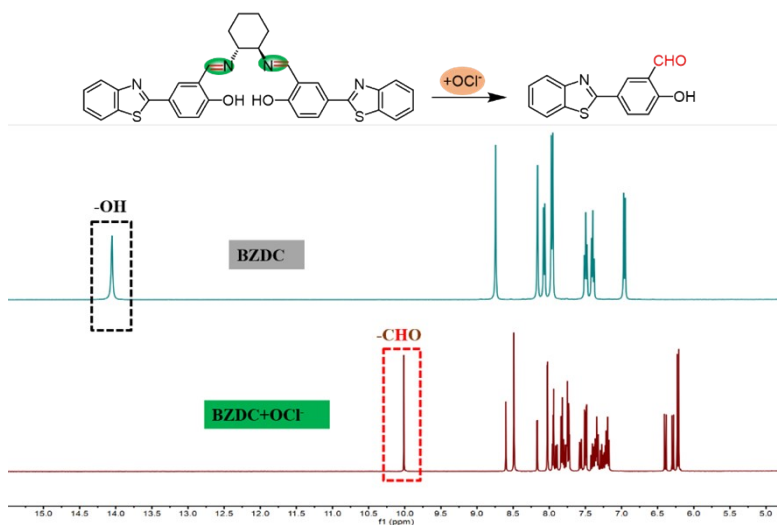

Fig. S4. Comparison of partial  $^1\text{H}$  NMR of probe BZDC in DMSO- $\text{d}_6$  before and after addition of excess  $\text{OCl}^-$ .

7、

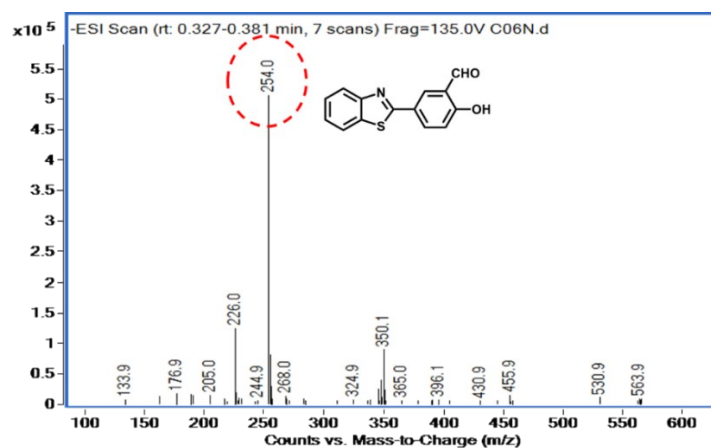

Fig. S5. Mass spectrum data of the product after the response between probe BZDC and  $\text{OCl}^-$ .

8、

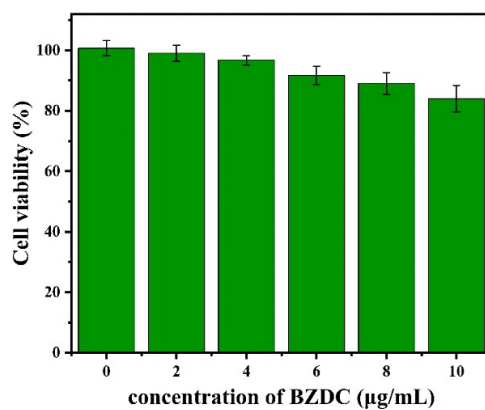

Fig. S6. Survival rates of HeLa cells cultured with different concentrations of probe solution measured by MTT method.
